# Supplementary material for: A Rapid HPLC-UV Protocol Coupled to Chemometric Analysis for the Determination of the Major Phenolic Constituents and Tocopherol Content in Almonds and the Discrimination of the Geographical Origin
Source: MDPI journal article supplement (doi:10.3390/molecules26185433), 2021-09-07
Supplement: s1 [file s1]

## Supplementary Material

### A rapid HPLC-UV protocol coupled to chemometric analysis for the determination of the major phenolic constituents and tocopherols content in almonds and the discrimination of the geographical origin

Natasa P. Kalogiouri, Petros Mitsikaris, Dimitris Klaoudatos, Athanasios Papadopoulos and Victoria F. Samanidou

**Table S1.** HPLC-UV analytical parameters for the determination of phenolic compounds.

| Compound         | Calibration equation  | Linear range (µg/g) | r <sup>2</sup> | LOD (µg/g) | LOQ (µg/g) |
|------------------|-----------------------|---------------------|----------------|------------|------------|
| ferulic acid     | $y = 56.12x - 0.63$   | 0.5 - 20            | 0.998          | 0.11       | 0.33       |
| syringic acid    | $y = 44.80x - 2.11$   | 0.5 - 20            | 0.999          | 0.14       | 0.42       |
| epicatechin      | $y = 20.86x + 4.17$   | 0.5 - 20            | 0.992          | 0.12       | 0.36       |
| catechin         | $y = 18.13x + 6.12$   | 2 - 20              | 0.997          | 0.42       | 1.26       |
| p-coumaric acid  | $y = 81.81x + 4.11$   | 1 - 20              | 0.998          | 0.31       | 0.93       |
| sinapic acid     | $y = 23.92x + 2.44$   | 1 - 20              | 0.993          | 0.28       | 0.84       |
| kaempferol       | $y = 62.05x + 0.93$   | 2 - 20              | 0.999          | 0.52       | 1.56       |
| diosmin          | $y = 12.53x - 0.35$   | 2 - 20              | 0.995          | 0.60       | 1.80       |
| quercetin        | $y = 389.16x - 16.42$ | 0.5 - 20            | 0.998          | 0.15       | 0.45       |
| vanillic acid    | $y = 63.62x + 4.37$   | 1 - 20              | 0.992          | 0.31       | 0.93       |
| epigallocatechin | $y = 69.18x - 4.62$   | 2 - 20              | 0.998          | 0.45       | 1.35       |
| gallic acid      | $y = 33.72x + 0.44$   | 0.5 - 20            | 0.992          | 0.05       | 0.15       |
| caffeic acid     | $y = 137.18x - 7.57$  | 0.5 - 20            | 0.996          | 0.25       | 0.75       |
| apigenin         | $y = 22.32x + 0.81$   | 2 - 20              | 0.996          | 0.44       | 1.32       |
| luteolin         | $y = 37.76x + 1.51$   | 2 - 20              | 0.997          | 0.52       | 1.56       |
| rosmarinic acid  | $y = 65.53x + 0.90$   | 0.5 - 20            | 0.998          | 0.08       | 0.24       |

LOD: limit of detection, LOQ: limit of quantitation

**Table S2.** Recoveries (%R) for the evaluation of repeatability.

| <b>Compound</b> | <b>Low<br/>Concentration<br/>(%R, n = 6)</b> | <b>%RSD</b> | <b>Medium<br/>Concentration<br/>(%R, n = 6)</b> | <b>%RSD</b> | <b>High<br/>Concentration<br/>(%R, n = 6)</b> | <b>%RSD</b> |
|-----------------|----------------------------------------------|-------------|-------------------------------------------------|-------------|-----------------------------------------------|-------------|
| apigenin        | 92.2                                         | 5.1         | 96.3                                            | 1.7         | 87.9                                          | 3.2         |
| caffeic acid    | 91.9                                         | 4.2         | 95.1                                            | 3.8         | 83.6                                          | 4.9         |
| catechin        | 95.4                                         | 3.2         | 97.6                                            | 4.2         | 92.1                                          | 1.9         |
| diosmin         | 95.2                                         | 4.5         | 88.2                                            | 4.8         | 92.6                                          | 5.5         |
| epicatechin     | 94.2                                         | 4.1         | 88.1                                            | 5.6         | 86.7                                          | 4.3         |
| ferulic acid    | 95.5                                         | 4.2         | 95.8                                            | 3.5         | 85.4                                          | 5.2         |
| gallic acid     | 95.4                                         | 3.4         | 88.1                                            | 5.9         | 87.4                                          | 5.1         |
| kaempferol      | 93.8                                         | 5.1         | 85.4                                            | 6.1         | 91.8                                          | 4.6         |
| luteolin        | 92.8                                         | 4.6         | 87.4                                            | 4.4         | 90.2                                          | 4.3         |
| p-coumaric acid | 92.9                                         | 1.8         | 86.8                                            | 4.4         | 88.2                                          | 2.9         |
| quercetin       | 93.1                                         | 4.6         | 95.9                                            | 5.4         | 95.5                                          | 4.2         |
| rosmarinic acid | 91.4                                         | 5.3         | 94.4                                            | 4.6         | 91.3                                          | 2.5         |
| sinapic acid    | 95.4                                         | 3.3         | 87.3                                            | 5.4         | 85.6                                          | 5.1         |
| syringic acid   | 90.4                                         | 1.6         | 87.5                                            | 5.3         | 83.1                                          | 2.6         |
| vanillic acid   | 91.8                                         | 2.3         | 94.6                                            | 3.8         | 90.4                                          | 5.1         |

**Table S3.** Recoveries (%R) for the evaluation of intermediate precision.

| Compound           | Low<br>Concentration<br>(%R, n = 3 x 3) | %RSD | Medium<br>Concentration<br>(%R, n = 3 x 3) | %RSD | High<br>Concentration<br>(%R, n = 3 x 3) | %RSD |
|--------------------|-----------------------------------------|------|--------------------------------------------|------|------------------------------------------|------|
| apigenin           | 102.2                                   | 6.4  | 98.8                                       | 6.3  | 95.6                                     | 6.5  |
| caffeic acid       | 97.8                                    | 6.2  | 97.4                                       | 7.4  | 94.5                                     | 5.2  |
| catechin           | 95.4                                    | 3.2  | 96.4                                       | 5.5  | 93.7                                     | 5.2  |
| diosmin            | 102.2                                   | 7.5  | 90.2                                       | 8.3  | 94.4                                     | 7.2  |
| epicatechin        | 98.2                                    | 7.4  | 99.1                                       | 6.6  | 94.4                                     | 6.6  |
| ferulic acid       | 100.4                                   | 7.2  | 97.2                                       | 4.1  | 95.4                                     | 7.8  |
| gallic acid        | 99.1                                    | 8.5  | 95.1                                       | 6.1  | 91.2                                     | 6.2  |
| kaempferol         | 101.6                                   | 10.1 | 92.4                                       | 7.2  | 95.4                                     | 6.4  |
| luteolin           | 97.6                                    | 5.6  | 92.2                                       | 8.2  | 93.8                                     | 6.4  |
| p-coumaric<br>acid | 101.2                                   | 8.8  | 98.5                                       | 3.7  | 95.4                                     | 4.1  |
| quercetin          | 98.1                                    | 7.5  | 92.3                                       | 5.9  | 96.7                                     | 6.4  |
| rosmarinic<br>acid | 103.4                                   | 7.7  | 97.2                                       | 5.5  | 96.7                                     | 3.3  |
| sinapic acid       | 98.4                                    | 9.2  | 93.3                                       | 6.5  | 93.6                                     | 5.6  |
| syringic<br>acid   | 95.4                                    | 6.6  | 100.5                                      | 6.2  | 92.8                                     | 6.4  |
| vanillic acid      | 97.5                                    | 8.6  | 95.5                                       | 10.5 | 93.2                                     | 8.1  |

**Table S4.** HPLC-UV analytical parameters for the determination of tocopherols.

| Compound                       | Calibration<br>equation | Linear<br>range<br>( $\mu\text{g/g}$ ) | $r^2$ | LOD<br>( $\mu\text{g/g}$ ) | LOQ<br>( $\mu\text{g/g}$ ) |
|--------------------------------|-------------------------|----------------------------------------|-------|----------------------------|----------------------------|
| $\alpha$ -tocopherol           | $y = 6.44x - 1.65$      | 5 – 50                                 | 0.995 | 0.33                       | 0.99                       |
| $\beta$ + $\gamma$ -tocopherol | $y = 7.21x + 0.10$      | 5 – 50                                 | 0.996 | 0.12                       | 0.36                       |
| $\delta$ -tocopherol           | $y = 6.21x + 0.59$      | 5 - 50                                 | 0.998 | 0.22                       | 0.66                       |

LOD: limit of detection, LOQ: limit of quantitation

**Table S5.** Recoveries (%R) for the evaluation of repeatability.

| <b>Compound</b>                    | <b>Low<br/>Concentration<br/>(%R, n = 6)</b> | <b>%RSD</b> | <b>Medium<br/>Concentration<br/>(%R, n = 6)</b> | <b>%RSD</b> | <b>High<br/>Concentration<br/>(%R, n = 6)</b> | <b>%RSD</b> |
|------------------------------------|----------------------------------------------|-------------|-------------------------------------------------|-------------|-----------------------------------------------|-------------|
| $\alpha$ -tocopherol               | 99.2                                         | 3.1         | 96.5                                            | 4.4         | 95.1                                          | 5.5         |
| $\beta$ + $\gamma$ -<br>tocopherol | 100.4                                        | 2.6         | 97.2                                            | 3.9         | 96.1                                          | 4.2         |
| $\delta$ -tocopherol               | 98.7                                         | 4.2         | 95.4                                            | 3.3         | 95.6                                          | 4.9         |

**Table S6.** Recoveries (%R) for the evaluation of intermediate precision.

| <b>Compound</b>                    | <b>Low<br/>Concentration<br/>(%R, n = 3 x 3)</b> | <b>%RSD</b> | <b>Medium<br/>Concentration<br/>(%R, n = 3 x 3)</b> | <b>%RSD</b> | <b>High<br/>Concentration<br/>(%R, n = 3 x 3)</b> | <b>%RSD</b> |
|------------------------------------|--------------------------------------------------|-------------|-----------------------------------------------------|-------------|---------------------------------------------------|-------------|
| $\alpha$ -tocopherol               | 95.1                                             | 5.7         | 94.5                                                | 5.9         | 94.7                                              | 6.6         |
| $\beta$ + $\gamma$ -<br>tocopherol | 96.8                                             | 7.2         | 94.2                                                | 7.7         | 95.3                                              | 7.6         |
| $\delta$ -tocopherol               | 94.6.7                                           | 6.2         | 93.2                                                | 8.1         | 96.2                                              | 8.1         |

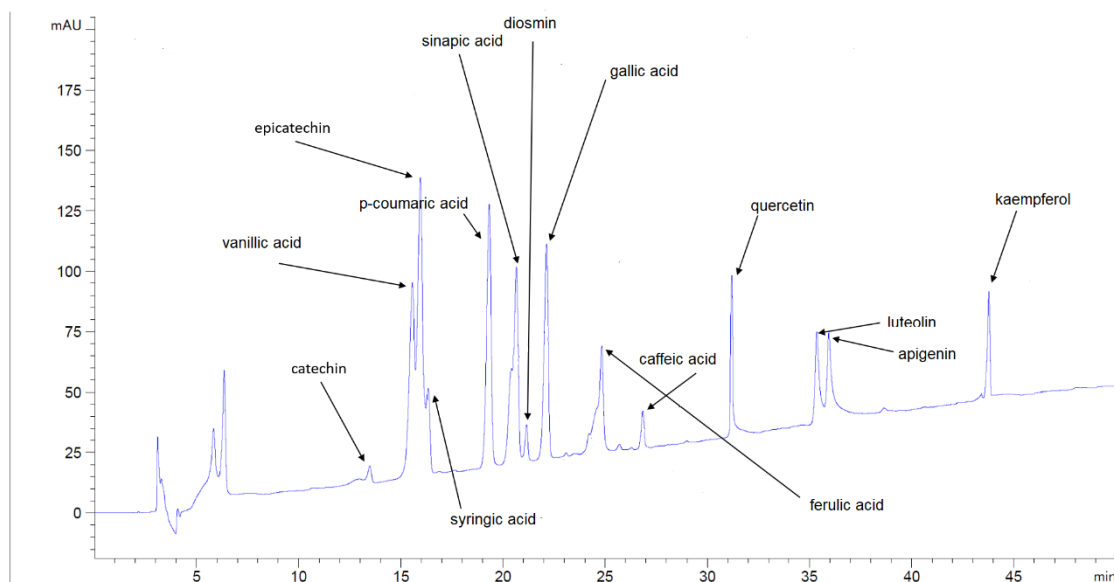

**Figure S1.** Characteristic chromatogram of an almond sample spiked at 5µg/g and monitored at 280 nm.

**Table S7.** Chromatographic retention times of the phenolic compounds determined in almonds.

| Phenolic compound | Rt (min) |
|-------------------|----------|
| catechin          | 13.9     |
| vanillic acid     | 15.2     |
| epicatechin       | 16.1     |
| syringic acid     | 16.8     |
| p-coumaric acid   | 18.9     |
| sinapic acid      | 20.8     |
| diosmin           | 21.1     |
| gallic acid       | 22.3     |
| ferulic acid      | 24.9     |
| caffeic acid      | 27.1     |
| quercetin         | 31.3     |
| luteolin          | 35.2     |
| apigenin          | 36.5     |
| kaempferol        | 43.5     |

Rt: retention time

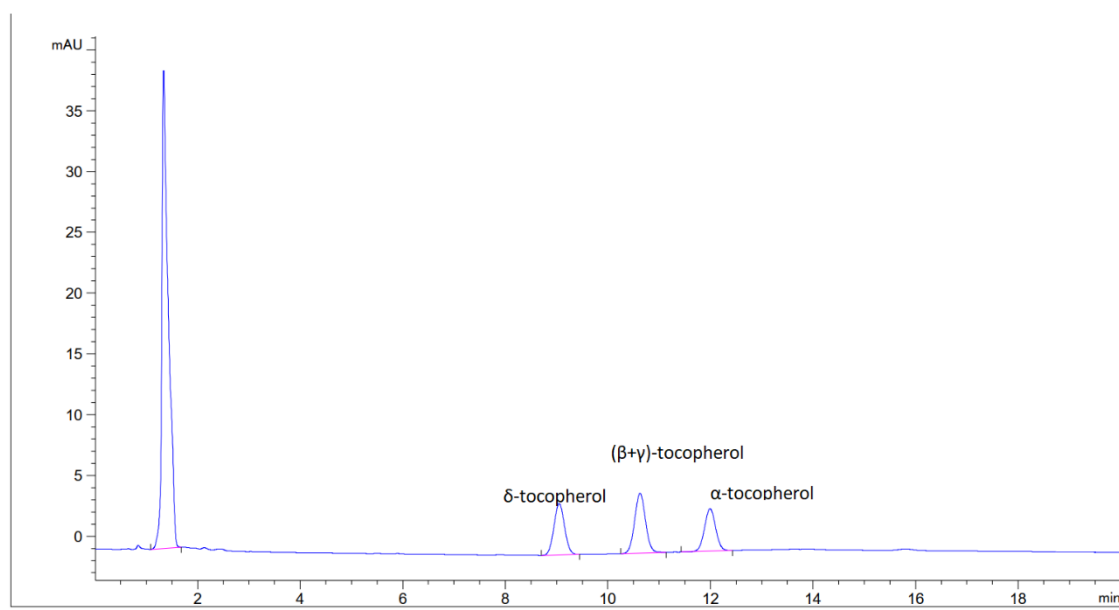

**Figure S2.** Characteristic chromatogram of a standard mixture of tocopherols at 10  $\mu\text{g/g}$  and monitored at 295 nm.

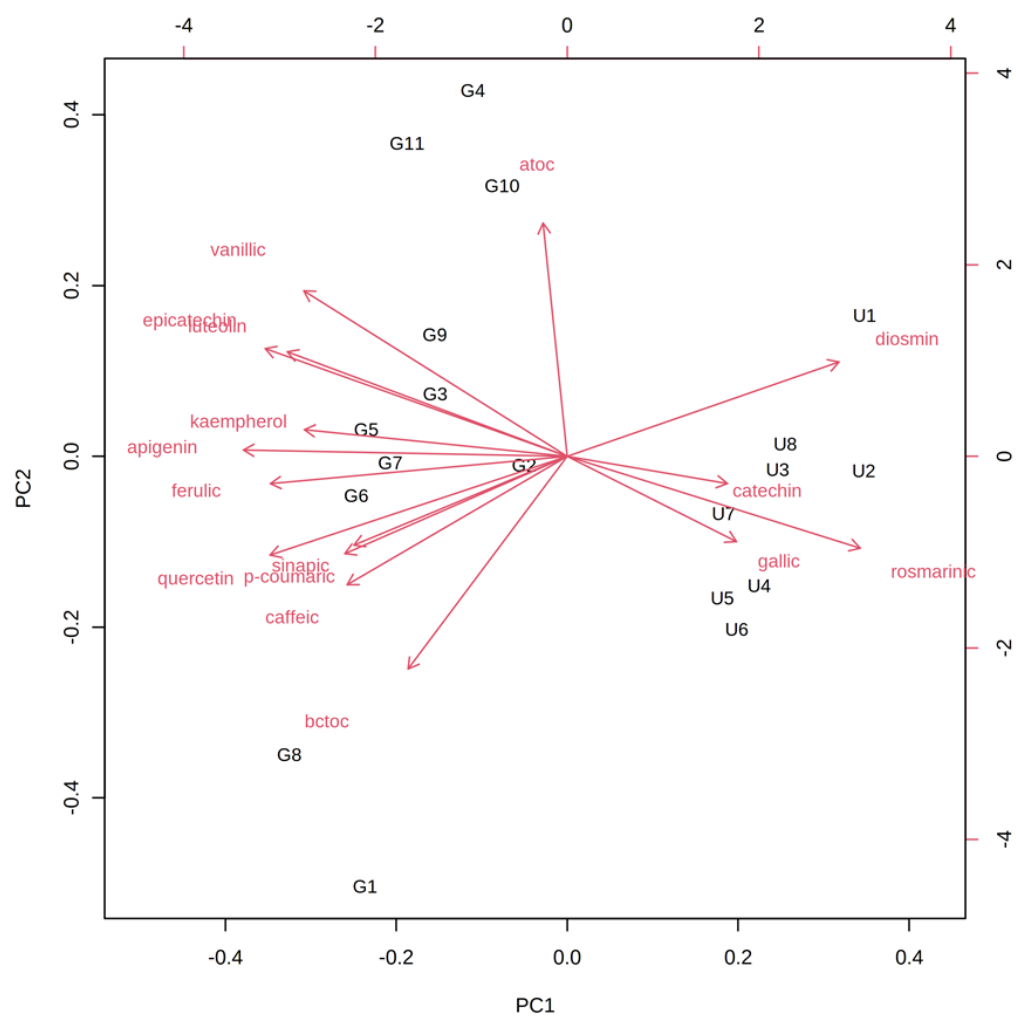

**Figure S3.** PCA biplot presenting the projection of the data set in PC1 and PC2. The red vectors show the influence on each PC (atoc:  $\alpha$ -tocopherol; bctoc:  $\beta$ + $\gamma$ -tocopherol).

## Model Summary

|                            |    |
|----------------------------|----|
| Total predictors           | 16 |
| Important predictors       | 11 |
| Number of terminal nodes   | 2  |
| Minimum terminal node size | 3  |

| Statistics             | Training | Test   |
|------------------------|----------|--------|
| Average -loglikelihood | 0,0000   | 0,0000 |
| Area under ROC curve   | 1,0000   | 1,0000 |
| 95% CI                 | (0; 1)   | (0; 1) |
| Lift                   | 4,0000   | 1,6000 |
| Misclassification cost | 0,0000   | 0,0000 |

**Figure S4.** Prediction model performance characteristics.
